# Supplementary material for: Cog-Wheel Octameric Structure of RS1, the Discoidin Domain Containing Retinal Protein Associated with X-Linked Retinoschisis
Source: PubMed Central journal article supplement (PMC4728063; doi:10.1371/journal.pone.0147653), 2016-01-26
Supplement: pone.0147653.s001.pdf [file pone.0147653.s001.pdf]

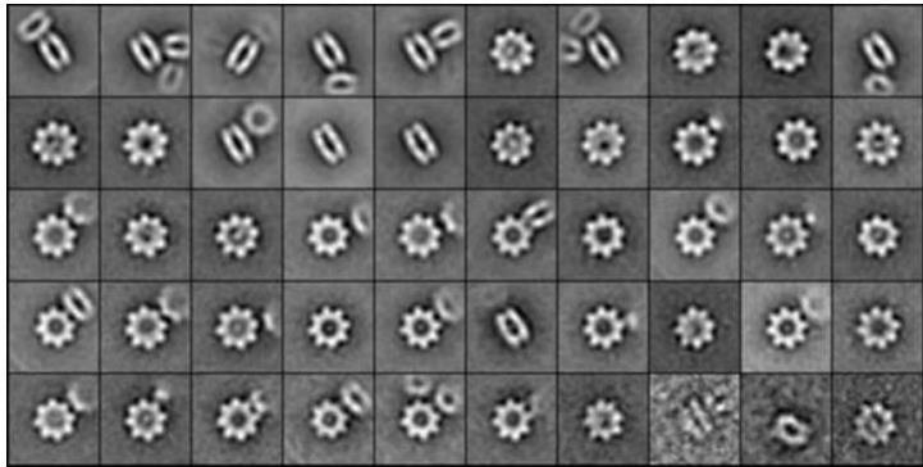

**S1 Fig. Refined images of the 50 classes of RS1 observed in 2-dimensions.**
